# Supplementary material
Source: PubMed Central journal article supplement (PMC2934636)
Supplement: supp_M109.087270_jbc.M109.087270-1.pdf [file supp_M109.087270_jbc.M109.087270-1.pdf]

## SUPPLEMENTAL FIGURES AND FIGURE LEGENDS

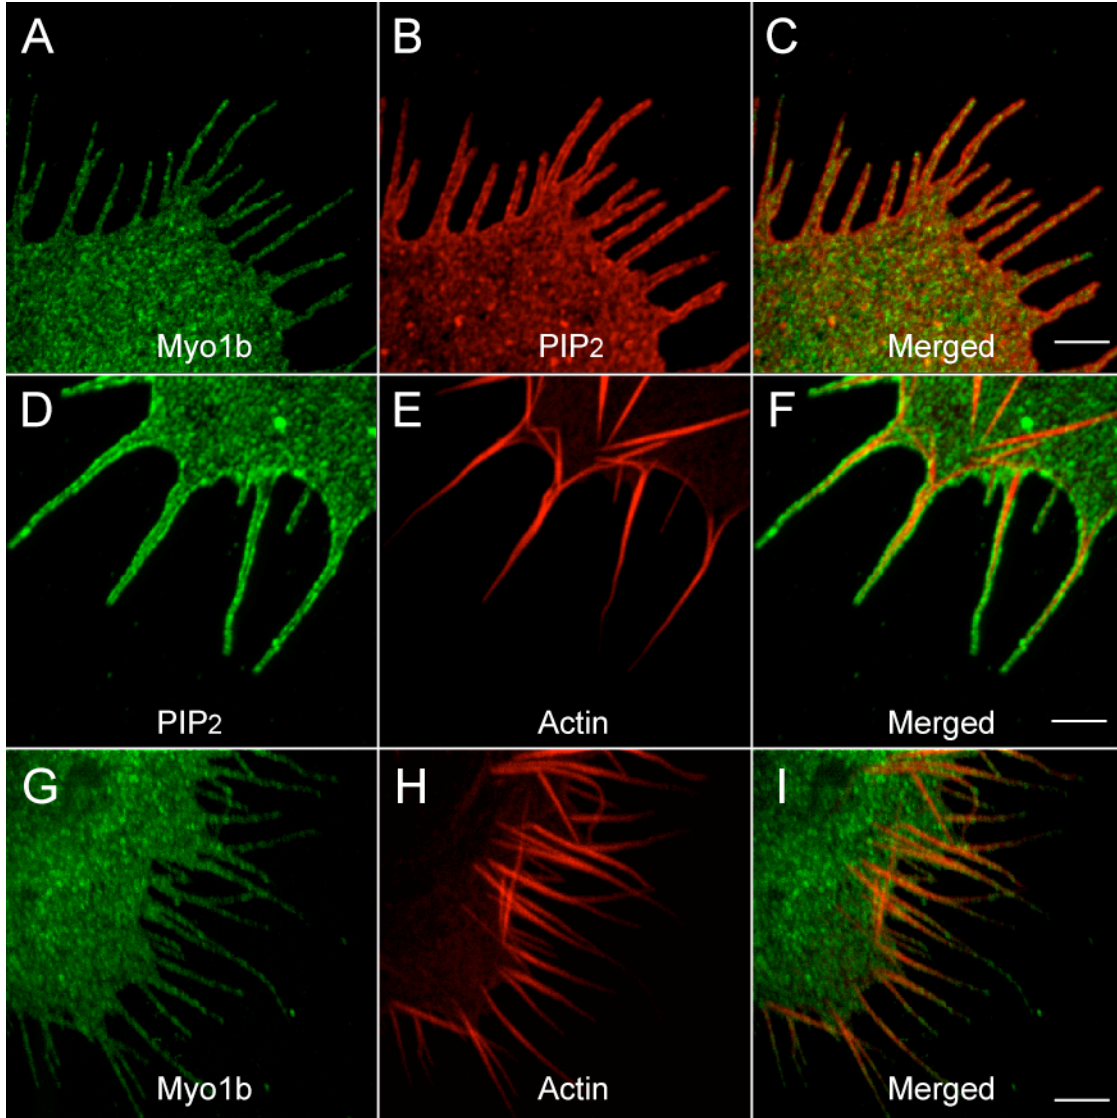

**FIGURE S1. Localization of Myo1b, PIP<sub>2</sub> and actin in COS-7 cells with espin-induced filopodia.** COS-7 cells were co-transfected with myc-tagged full-length wild-type Myo1b and untagged espin. Transfected cells were stained with anti-myc (*A* and *G*, green), anti-PIP<sub>2</sub> (*B*, red and *D*, green) and rhodamine phalloidin (*E* and *H*, red). Panels *C*, *F* and *I* are merged images of (*A* and *B*), (*D* and *E*), and (*G* and *H*), respectively. Myo1b colocalized with actin within the filopodial membrane containing PIP<sub>2</sub>. Bars, 5 μm.

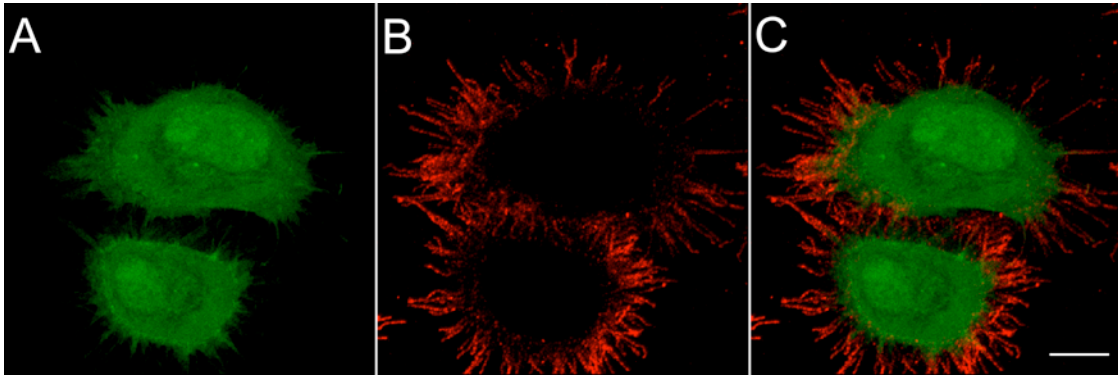

**FIGURE S2. Diffuse localization of Btk-PH-GFP in HeLa cells.** HeLa cells were transfected with Btk-PH-GFP, a PIP<sub>3</sub>-specific binding protein, and stained with anti-PIP<sub>2</sub>. Btk-PH-GFP localized throughout the cytoplasm and nucleus, but not in filopodia (*A*), a pattern distinct from that of PIP<sub>2</sub> (*B* and *C*). Bar, 10  $\mu$ m.
